# Supplementary material for: A strategy of enhancing the ionic conductivity of Li7La3Zr2O12 under accurate sintering conditions
Source: Royal Society of Chemistry journal article supplement (doi:10.1039/d2cp03072a), 2022-01-01
Supplement: d2cp03072a1.pdf [file d2cp03072a1.pdf]

## *Supplementary Information*

# Strategy of Enhancing Ionic Conductivity of $\text{Li}_7\text{La}_3\text{Zr}_2\text{O}_{12}$ with Accurate Sintering Conditions

*Minjea Kim<sup>a</sup>, Hyun Gyu Park<sup>a</sup> and Kwangjin Park<sup>a\*</sup>*

<sup>a</sup>Department of Mechanical Engineering, Gachon University, 1342 Seongnamdaero, Sujeong-gu, Seongnam-si, Gyeonggi-do, 13120, Republic of Korea

\*Corresponding authors

E-mail: Kwangjin Park<sup>a</sup> ([ydmj79@gachon.ac.kr](mailto:ydmj79@gachon.ac.kr))

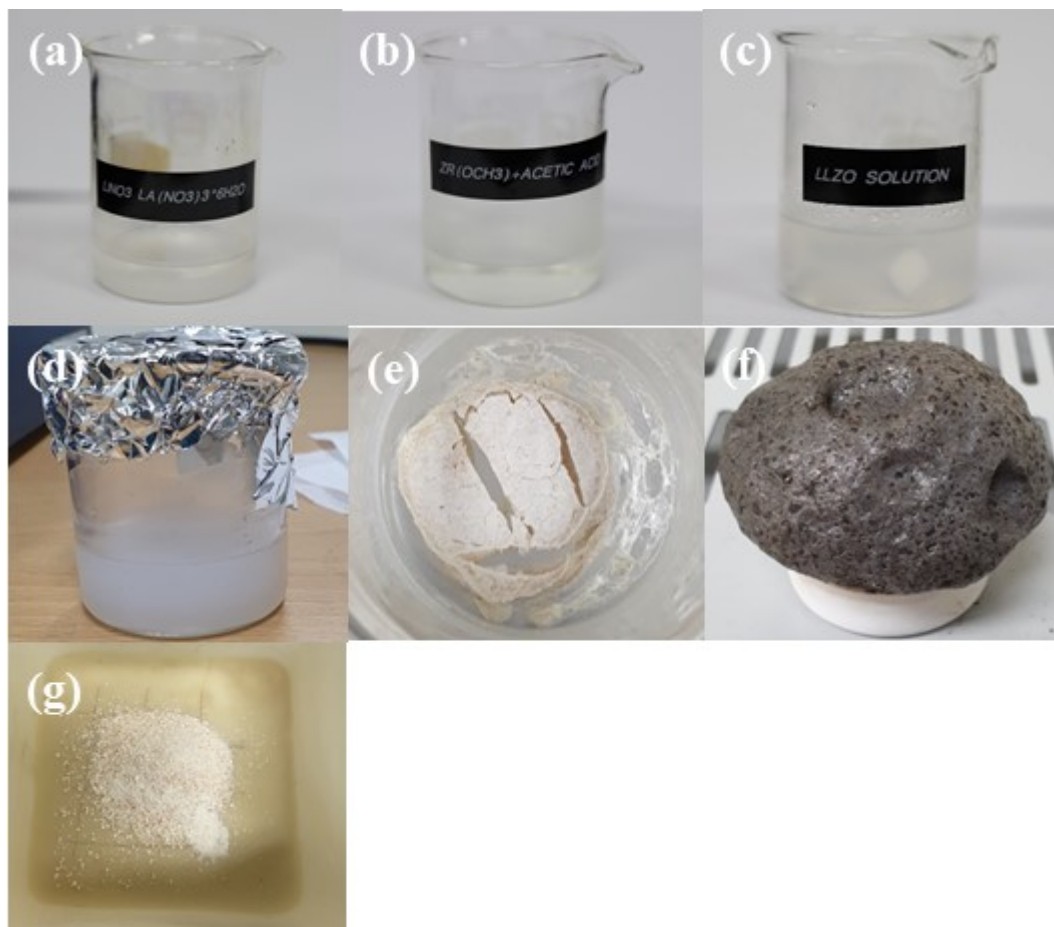

**Figure S1.** (a)  $\text{LiNO}_3$ ,  $\text{La}(\text{NO}_3)_3 \cdot 6\text{H}_2\text{O}$  in 1-propanol, (b)  $\text{Zr}(\text{OH}_7\text{C}_3)_4$  + acetic acid in 1-propanol, (c) LLZO solution, (d) LLZO gel, (e) dried LLZO gel, calcinated at 450 °C for 4 h in air atmosphere (f) LLZO with excess acetic acid, and (g) LLZO powder

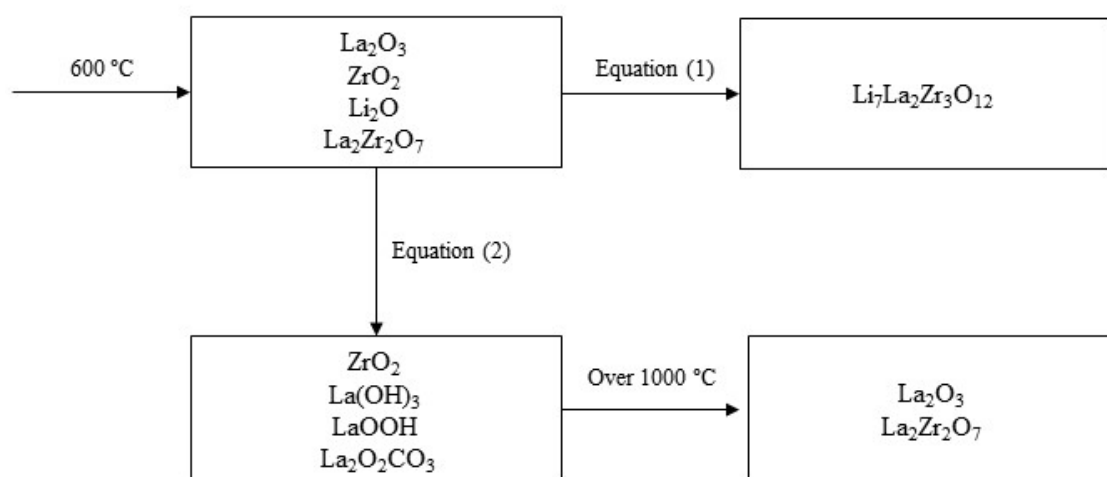

**Figure S2.** Schematics of HRFTP4.

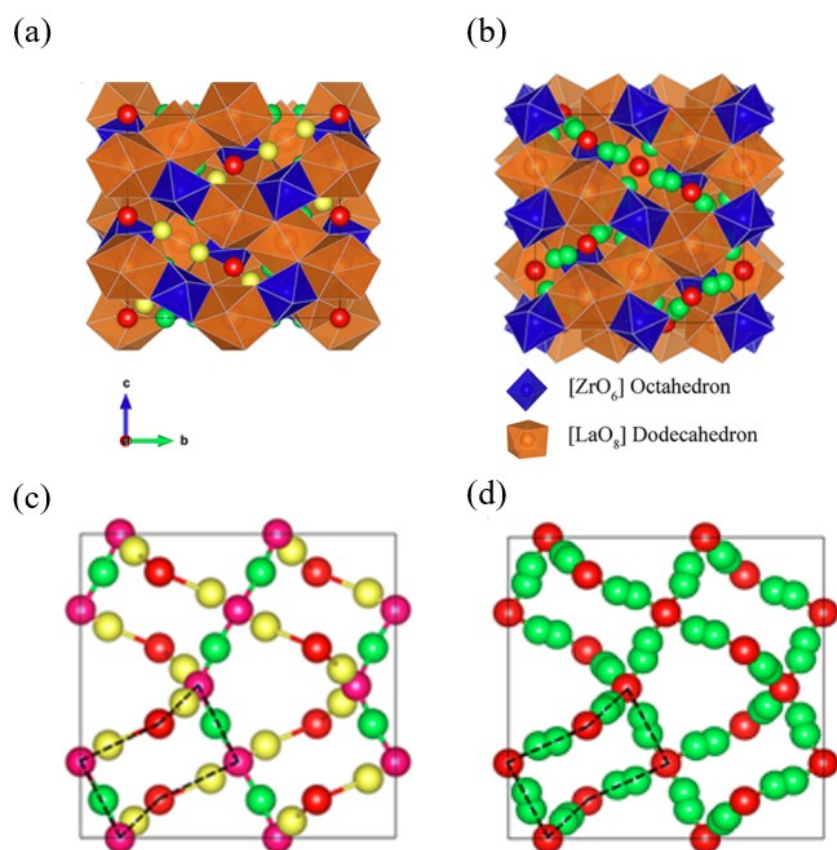

**Figure S3.** (a) Tetragonal LLZO phase, (b) cubic LLZO phase, Li arrangement of (c) tetragonal LLZO phase, and (d) cubic LLZO phase.<sup>3</sup>

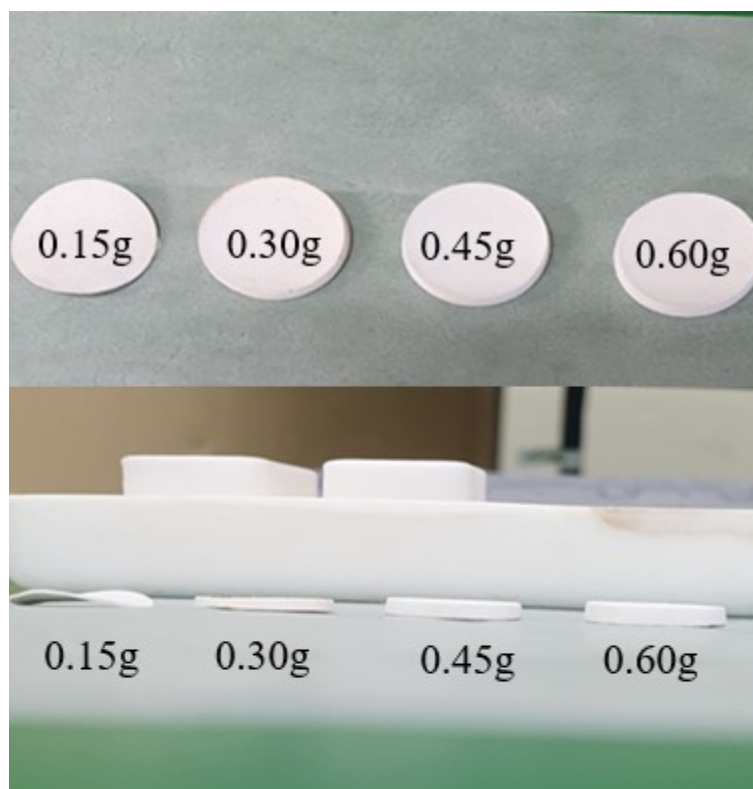

**Figure S4.** LLZO pellet distortion according to thickness changes after the sintering process.

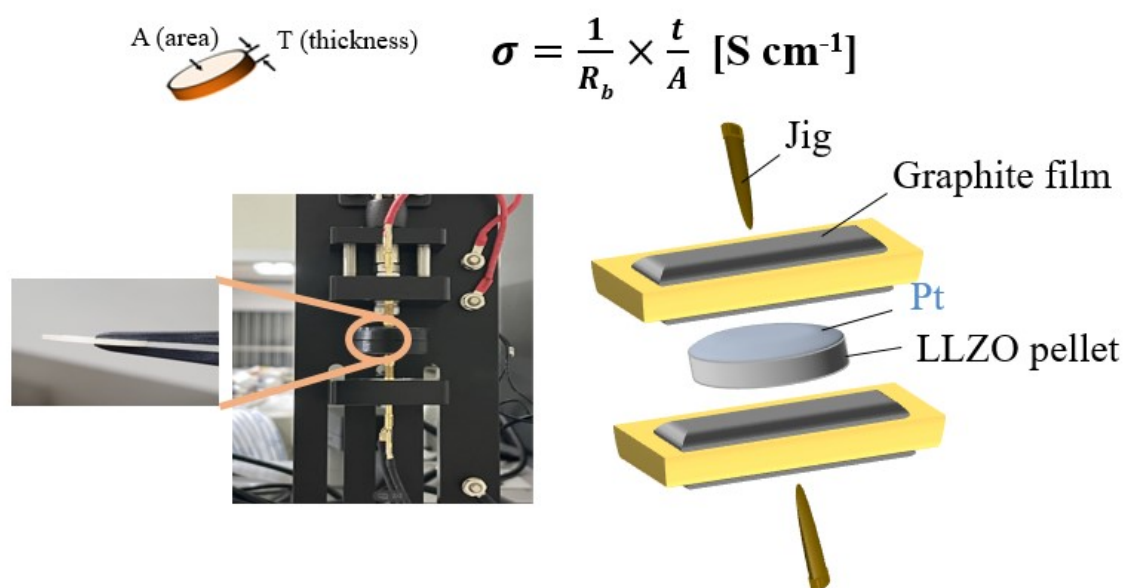

**Figure S5.** EIS and schematic of Jig for EIS analysis.

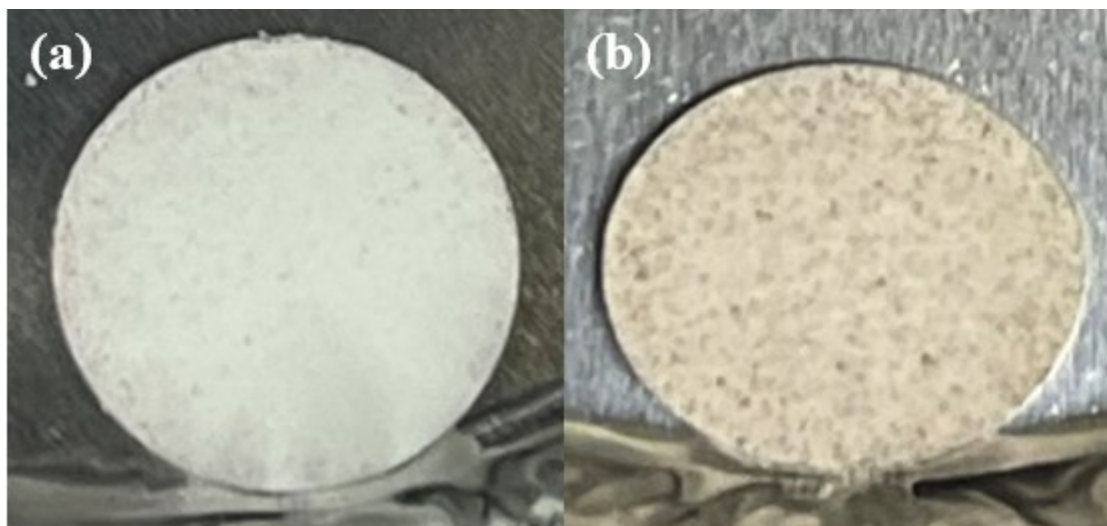

**Figure S6.** (a) LLZO pellet after sintering at 1,100 °C, and (b) LLZO pellet after sintering at 1,200 °C.

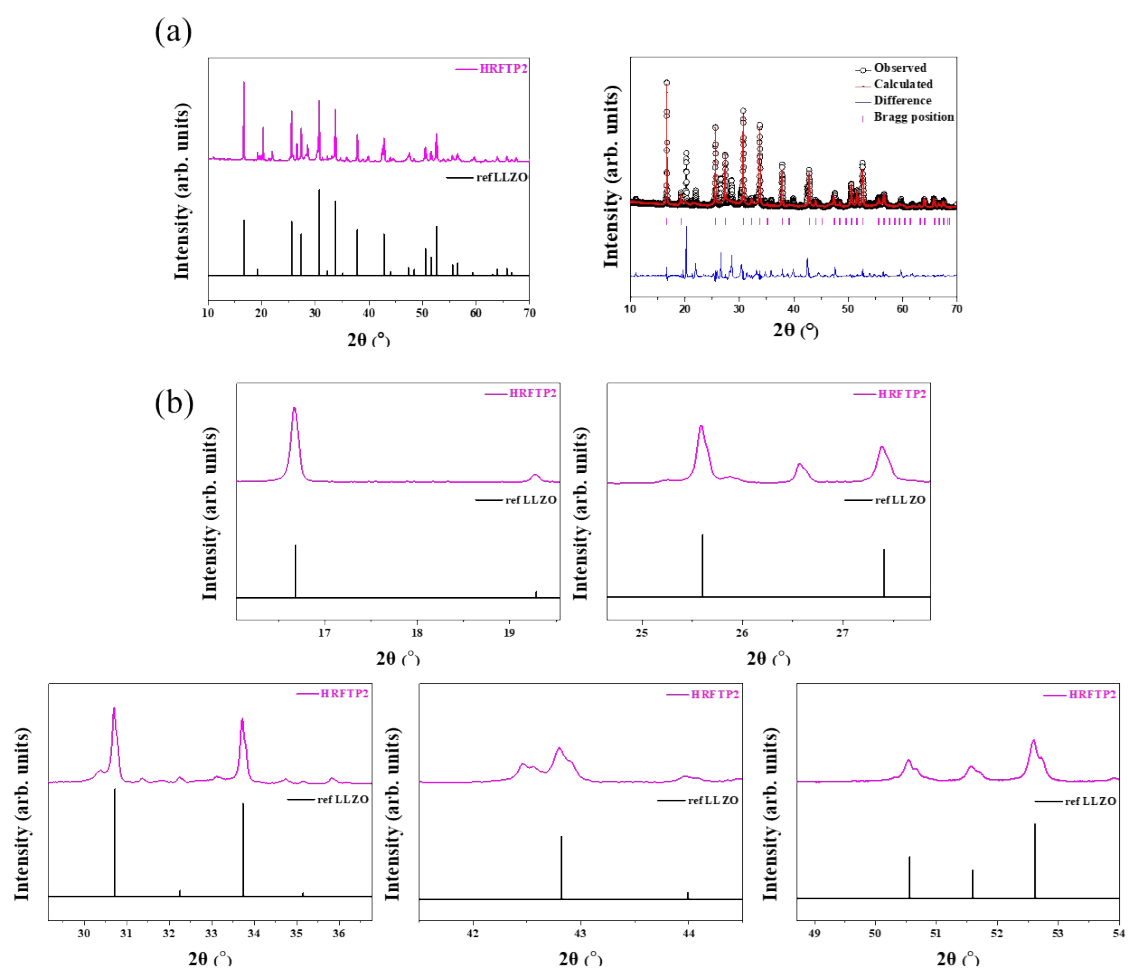

**Figure S7.** (a) XRD analysis and Rietveld refinement of HRFTP2 LLZO and (b) magnified XRD analysis of HRFTP2 LLZO.
